# Supplementary material for: An MXene-Grafted Terpolymer Hydrogel for Adsorptive Immobilization of Toxic Pb(II) and Post-Adsorption Application of Metal Ion Hydrogel
Source: MDPI journal article supplement (doi:10.3390/gels9100827), 2023-10-19
Supplement: s1 [file s1]

# A MXene-grafted-terpolymer hydrogel for adsorptive immobilization of toxic Pb(II) and post-adsorption application of metal ion hydrogel

Himarati Mondal<sup>\*,a</sup>, Mrinmoy Karmakar<sup>\*,b,c</sup> and Bhaskar Datta<sup>\*,a,d</sup>

<sup>a</sup>Department of Chemistry, Indian Institute of Technology Gandhinagar, Palaj, Gujarat-382055, India

<sup>b</sup>Department of Chemical Engineering, Indian Institute of Technology Gandhinagar, Palaj, Gujarat-382055, India

<sup>c</sup>Presently in Department of Pharmacy, College of Pharmacy, Kangwon National University, Chuncheon, Gangwon 24341, Republic of Korea

<sup>d</sup>Department of Biological Engineering, Indian Institute of Technology Gandhinagar, Palaj, Gujarat-382055, India

\*Correspondence: authors: himarati.m@iitgn.ac.in/ himaratimondal236@gmail.com (H.M.); mrinmoy.enterprise@gmail.com (M.K.); and bdatta@iitgn.ac.in (B.D.)

## Index

| <b>Entries</b> | <b>Details</b>                                                     | <b>Pages</b> |
|----------------|--------------------------------------------------------------------|--------------|
| Table S1       | Optimization of synthesis parameters for <b>TP</b> and <b>MXTP</b> | S3           |
| Text S1        | Derivation of working formula for CV analyses.                     | S4           |
| Text S2        | EIS analyses                                                       | S4           |
| Figure S1      | FTIR of MAX and MXene                                              | S5           |
| Figure S2      | pH <sub>Hzc</sub> of <b>MXTP</b>                                   | S6           |
| Figure S3      | XRD of MAX and MXene                                               | S6           |
| Figure S4      | Wide-scan survey plot of <b>TP</b> and <b>MXTP</b>                 | S7           |

**Table S1.** Optimization of synthesis parameters for MXTP.

| Hydrogel           | A (–)       | B (wt.%)   | C (wt.%)   | D (wt.%)    | E (K)      | MXene (wt.%) | ESR(s) (g/g)          |
|--------------------|-------------|------------|------------|-------------|------------|--------------|-----------------------|
| A                  | 5.0         | 1.5        | 1.0        | 20.0        | 298        | 0.50         | 418.50 ± 12.56        |
| <b>B</b>           | <b>10.0</b> | <b>1.5</b> | <b>1.0</b> | <b>20.0</b> | <b>298</b> | <b>0.50</b>  | <b>558.00 ± 16.74</b> |
| C                  | 20.0        | 1.5        | 1.0        | 20.0        | 298        | 0.50         | 502.20 ± 15.07        |
| D                  | 10.0        | 1.0        | 1.0        | 20.0        | 298        | 0.50         | 491.04 ± 14.71        |
| <b>B</b>           | <b>10.0</b> | <b>1.5</b> | <b>1.0</b> | <b>20.0</b> | <b>298</b> | <b>0.50</b>  | <b>558.00 ± 16.74</b> |
| E                  | 10.0        | 2.0        | 1.0        | 20.0        | 298        | 0.50         | 513.36 ± 15.41        |
| B                  | 10.0        | 1.5        | 1.0        | 20.0        | 298        | 0.50         | 558.00 ± 16.74        |
| <b>F</b>           | <b>10.0</b> | <b>1.5</b> | <b>1.5</b> | <b>20.0</b> | <b>298</b> | <b>0.50</b>  | <b>620.00 ± 18.60</b> |
| G                  | 10.0        | 1.5        | 2.0        | 20.0        | 298        | 0.50         | 570.40 ± 17.11        |
| H                  | 10.0        | 1.5        | 1.5        | 10.0        | 298        | 0.50         | 551.80 ± 16.55        |
| <b>F</b>           | <b>10.0</b> | <b>1.5</b> | <b>1.5</b> | <b>20.0</b> | <b>298</b> | <b>0.50</b>  | <b>620.00 ± 18.60</b> |
| I                  | 10.0        | 1.5        | 1.5        | 30.0        | 298        | 0.50         | 576.60 ± 17.29        |
| –                  | 10.0        | 1.5        | 1.5        | 20.0        | 288        | 0.50         | No gelation           |
| <b>F</b>           | <b>10.0</b> | <b>1.5</b> | <b>1.5</b> | <b>20.0</b> | <b>298</b> | <b>0.50</b>  | <b>620.00 ± 18.60</b> |
| J                  | 10.0        | 1.5        | 1.5        | 20.0        | 308        | 0.50         | 589.00 ± 17.67        |
| K                  | 10.0        | 1.5        | 1.5        | 20.0        | 288        | 0.25         | 415.40 ± 12.46        |
| <b>F</b>           | <b>10.0</b> | <b>1.5</b> | <b>1.5</b> | <b>20.0</b> | <b>298</b> | <b>0.50</b>  | <b>620.00 ± 18.60</b> |
| L                  | 10.0        | 1.5        | 1.5        | 20.0        | 308        | 0.75         | 520.80 ± 15.62        |
| <b>F (optimum)</b> | <b>10.0</b> | <b>1.5</b> | <b>1.5</b> | <b>20.0</b> | <b>298</b> | <b>0.50</b>  | <b>620.00 ± 18.60</b> |

Text S1. Derivation of working formula for CV analyses. The current ( $I$ , A) in GSE can be expressed as:

$$I = C_p \times m \times k \quad (S1)$$

Here,  $C_p$  (F g<sup>-1</sup>),  $m$  (g), and  $k$  (V s<sup>-1</sup>) represent specific capacitance, mass of electroactive material (drop-casted on GSE), and scanning rate, respectively.

When potential of GSE was varied within  $V_1$ – $V_2$  (V), then Eq. (S1) can be reframed as:

$$\int_{V_1}^{V_2} I(V) dV = \int_{V_1}^{V_2} (C_p \times m \times k) dV \quad (S2)$$

Since,  $\int_{V_1}^{V_2} I(V) dV$  can be related to area under CV curve ( $A$ , A V), Eq. (S2) modifies as:

$$A = C_p m k \int_{V_1}^{V_2} dv \quad (S3)$$

$$\text{Or, } A = C_p m k (V_2 - V_1) \quad (S4)$$

In charging condition of a capacitor,  $A$  is replaced by  $A_1$  and Eq. (S4) transforms to:

$$A_1 = C_p m k (V_2 - V_1) \quad (S4A)$$

However, in discharging condition,  $A$  is replaced by  $A_2$  and Eq. (S4) is modified to:

$$A_2 = C_p m k (V_1 - V_2) \quad (S4B)$$

Therefore, area under CV curve, i.e.,  $A$  can be calculated as:

$$A = A_1 - A_2 = 2[C_p m k (V_2 - V_1)] \quad (S5)$$

Eq. (S5) can be rearranged in terms of  $C_p$ :

$$C_p = \frac{A}{2(V_2 - V_1)mk} \quad (S6)$$

$C_p$  values of **MXTP** and **Pb(II)-MXTP** were estimated by using Eq. (S6).

Text S2. *EIS analyses*. EIS experiments were carried out using a three-electrode module, composed of GSE, RE, and CE. During EIS, alternating potential is sent towards the sample on GSE, and the corresponding alternating current ( $i$ , A) signal is recorded. Therefore, input potential and output current can be written as shown in Eq. (S7) and Eq. (S8), respectively:

$$E(t) = E_o \sin(\omega t) \quad (S7)$$

$$i(t) = i_o \sin(\omega t) \quad (S8)$$

Here,  $t$  (s),  $i_o$  (A)/  $E_o$  (V), and  $\omega$  (Hz) represent time, amplitude of current/ potential, and angle of frequency, respectively.

However, phase shift ( $\phi$ , degree) is observed for output current. Hence, Eq. (S8) can be modified as:

$$i(t) = i_o \sin(\omega t - \phi) \quad (S8A)$$

For AC output system, impedance ( $Z$ , ohm) can be defined as:

$$Z = \frac{E}{i} \quad (S9)$$

The  $x$  and  $y$  components of  $Z$ , i.e.,  $Z_x$  (ohm) and  $Z_y$  (ohm), respectively, can be evaluated as:

$$Z_x = Z_{mag} \cos \theta \quad (S10A)$$

$$Z_y = Z_{mag} \sin \theta \quad (S10B)$$

Here,  $Z_{mag}$  (ohm) is the vector sum of  $Z_x$  and  $Z_y$  and can be defined as:

$$Z_{mag} = \sqrt{Z_x^2 + Z_y^2} = \frac{E_0}{i_0} \quad (S11)$$

$Z_x$  and  $Z_y$  are also termed as real impedance ( $Z'$ , ohm) whereas  $Z_z$  ( $Z''$ , ohm) is considered as imaginary impedance.

From EIS, values of  $Z_{mag}$ ,  $Z'$ ,  $Z''$ ,  $\omega$ , and  $\varphi$  of an electroactive material can be obtained. From there, Bode and Nyquist plots are drawn, and from the solution resistance ( $R_s$ , ohm) of Nyquist plot, conductivity ( $\sigma$ , ohm  $m^{-1}$ ) of the sample can be calculated by using the following equation:

$$(\sigma) = \frac{1}{R_s} \times \frac{L}{A} \quad (S12)$$

Here,  $L$  (m) and  $A$  ( $m^2$ ) represent thickness and area of GSE, respectively.

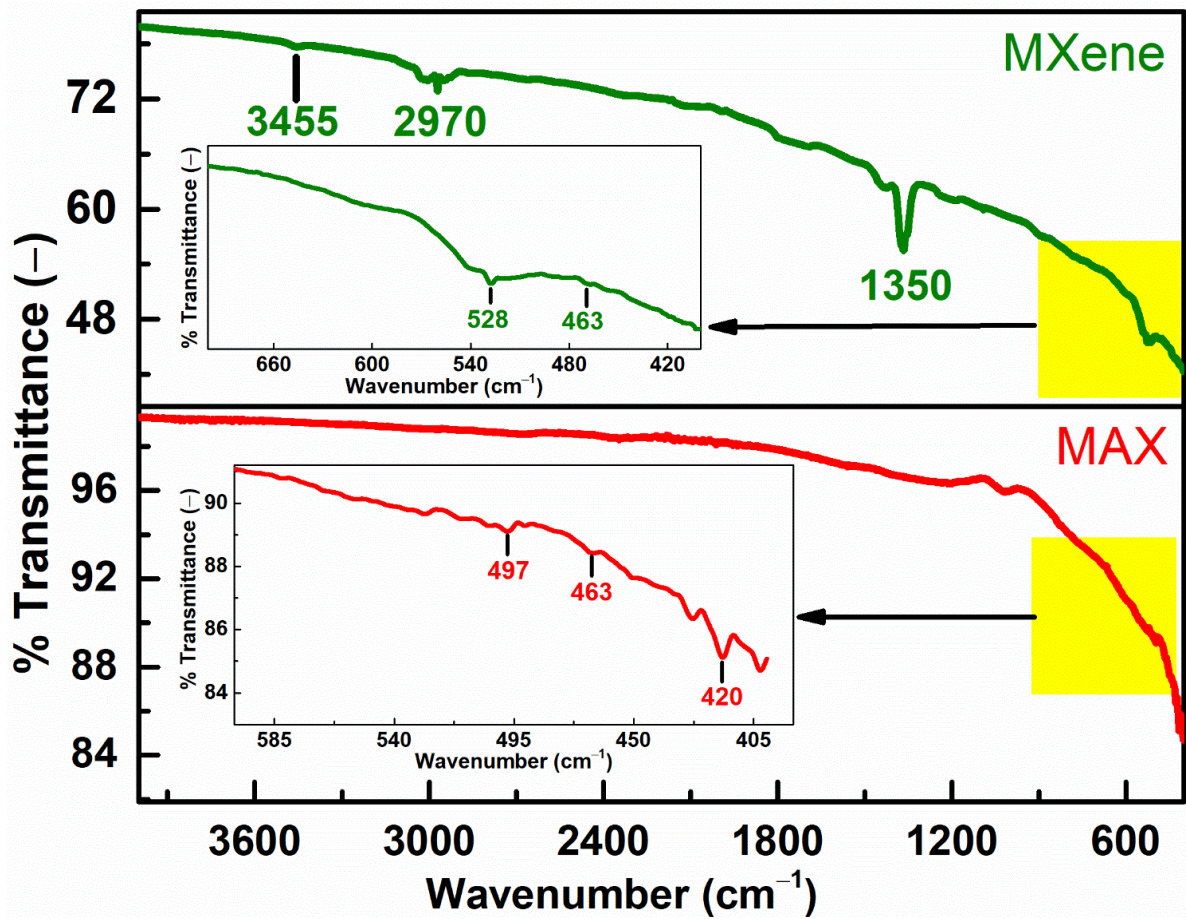

Figure S1. FTIR of MAX and MXene

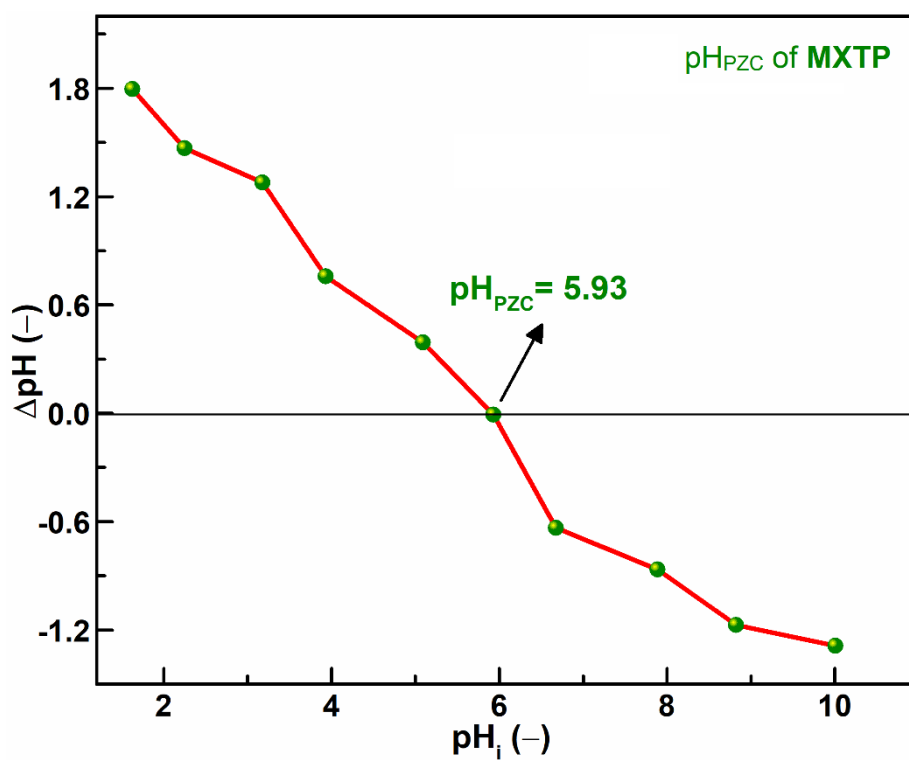Figure S2.  $\text{pH}_{\text{PZC}}$  of MXTP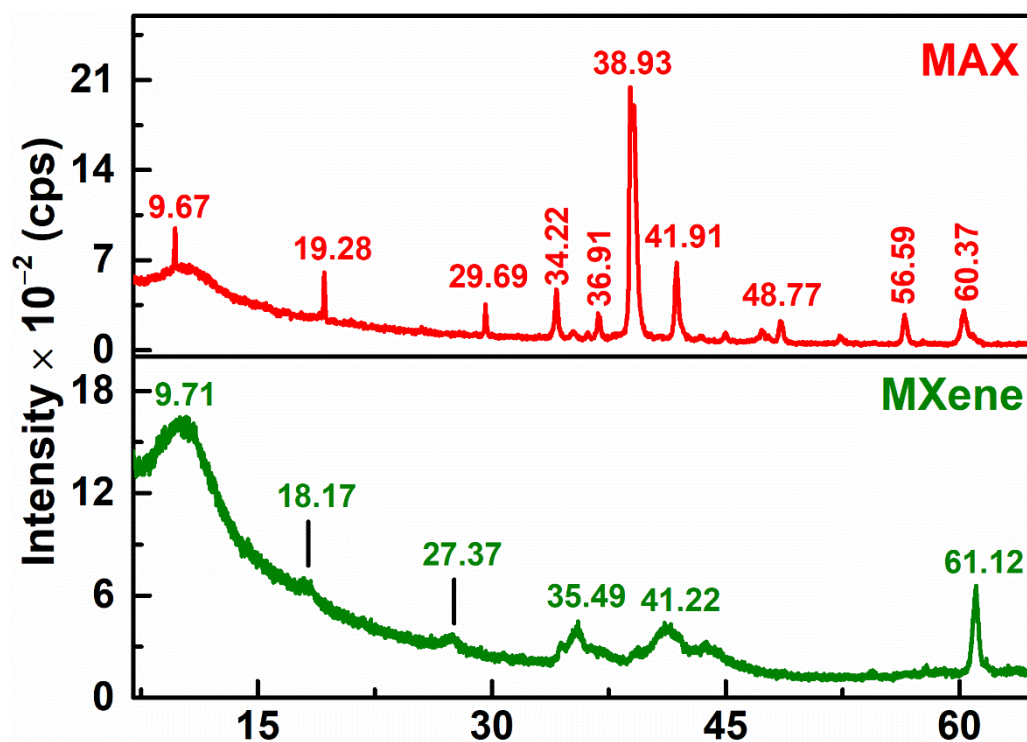

Figure S3. XRD of MAX and MXene

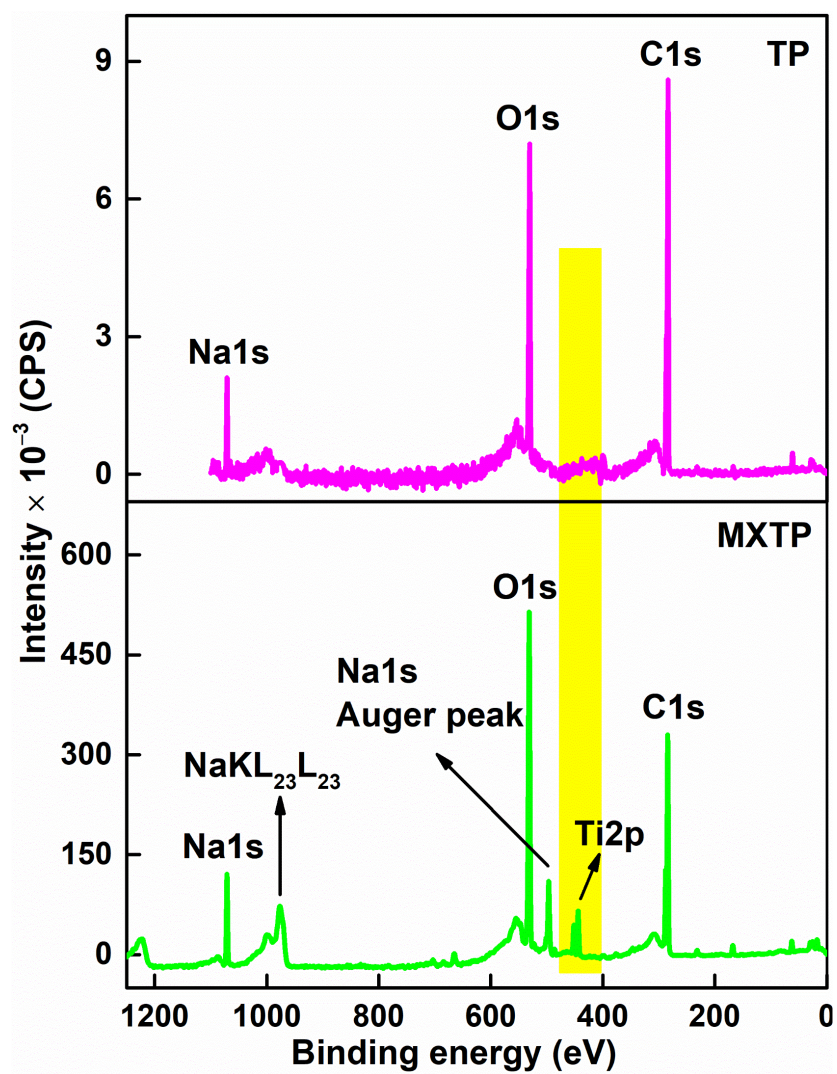

Figure S4. Wide-scan survey plot of TP and MXTP
